# Supplementary material
Source: PubMed Central journal article supplement (PMC2992304)

## Supplementary Figures

**Figure S1. Protein expression level of six deletion derivatives of CAPS1-YPet-HA expressed in PC12 cells.** Wild-type CAPS1-YPet-HA, PH domain alone (PH)-YPet-HA, PH domain and Munc13-1-homologous domain ( $\Delta$ N-Ter)-YPet-HA, the region from the 1st amino acid to the PH domain ( $\Delta$ C-Ter)-YPet-HA, C2 and PH domain ( $\Delta$ N/C-Ter)-YPet-HA, C2-domain-skipped CAPS1 ( $\Delta$ C2)-YPet-HA were expressed in PC12 cells and the cell lysates were electrophoresed and analyzed by western blotting using anti-HA antibody followed by densitometric analysis. The error bars indicate the SD.

**Figure S2. Distribution of the ARF family mRNAs in whole mouse brain.** *A-J*, Sagittal sections of P7 and P21 whole brain were analyzed by in situ hybridization. (*A-E*) ARF1 (*A*), ARF3 (*B*), ARF4 (*C*), ARF5 (*D*), and ARF6 (*E*) mRNA distribution in the whole P7 brain. (*F-J*) ARF1 (*F*), ARF3 (*G*), ARF4 (*H*), ARF5 (*I*), and ARF6 (*J*) mRNA distribution in the whole P21 brain.

**Figure S3. Specificity of anti-ARF antibodies and siRNA of class II ARFs.** *A-D*, The lysates of COS-7 cells expressing mouse ARFs tagged with C-terminal FLAG epitopes were blotted with anti-ARF antibody (clone. no. 1D9) (*A*), anti-ARF5 antibody (*B*), or anti-FLAG antibody (*C*). The asterisk indicates immunoreactivity for endogenous ARF5. *D*, The lysates of COS-7 cells co-transfected with pEF-BOS-ARF4-FLAG and the siRNA of ARF4 (cat. no. 128374 D05) were probed with anti-FLAG antibody. *E*, The lysates of COS-7 cells co-transfected with pEF-BOS-ARF5-FLAG and the siRNA of ARF5 (cat. no. 128374 C09) were probed with anti-FLAG antibody.

**Figure S4. Amino acid sequence comparisons of mouse ARF proteins.** *A*, Amino acids that are identical in two or more family members are shown against a gray background. Amino acids that are identical in the class II ARFs are shown against a black background. *B*, Three-dimensional structure of mouse ARF1. Figure was generated using Cn3D software (<http://www.ncbi.nlm.nih.gov/Structure/CN3D/cn3d.shtml>) from the structure 1R8Q in the Protein Data Bank (<http://www.rcsb.org/pdb/>). The N-terminal region between the 3rd and 6th amino acids (*yellow*), which contains the critical amino acids for CAPS1 binding to ARF4/5, is shown in the ARF1 3D structure.

**Fig. S1**

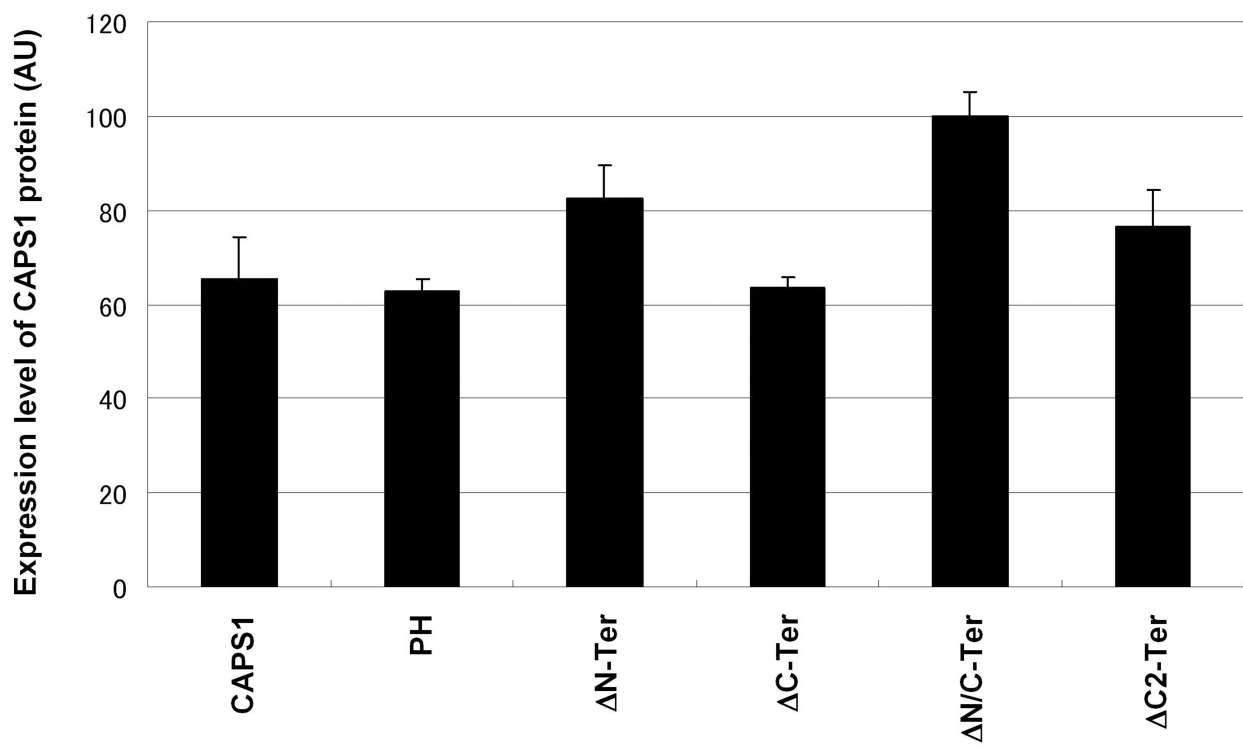

Fig. S2

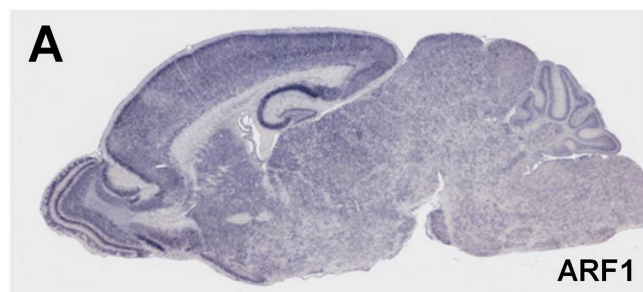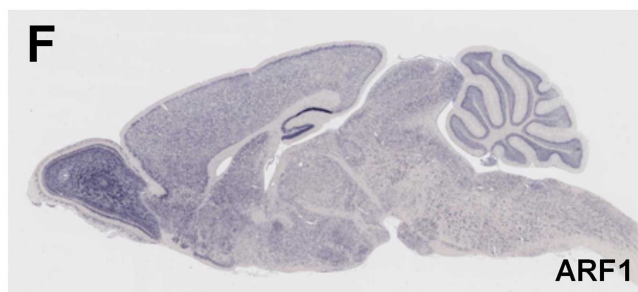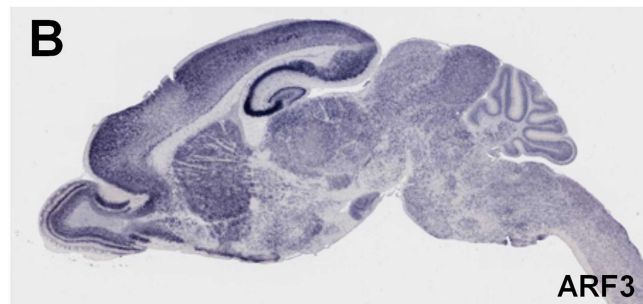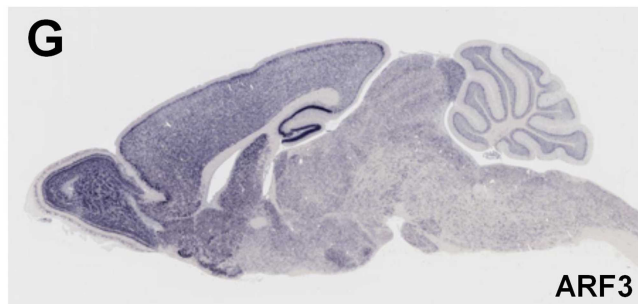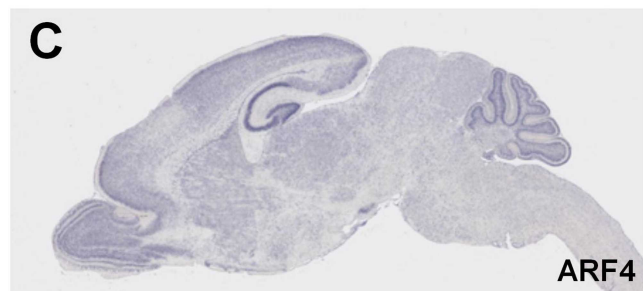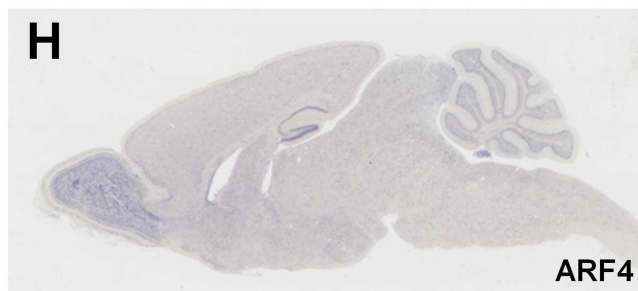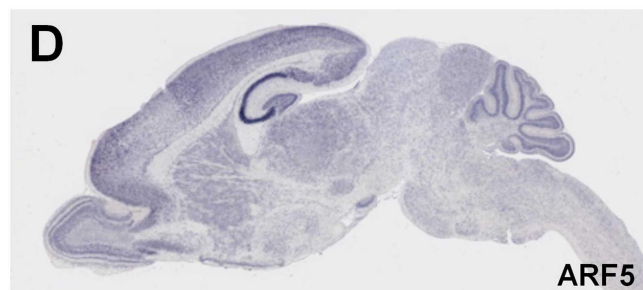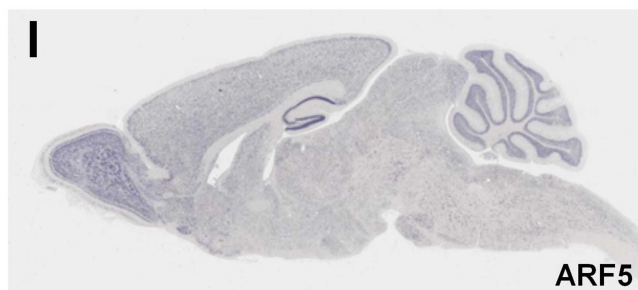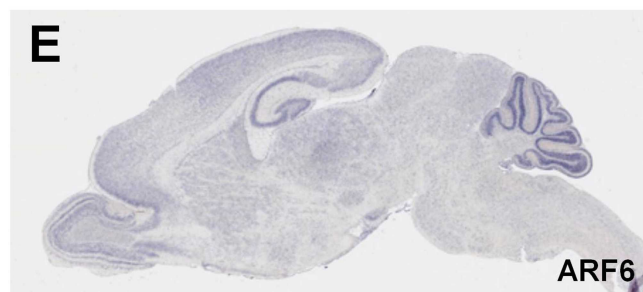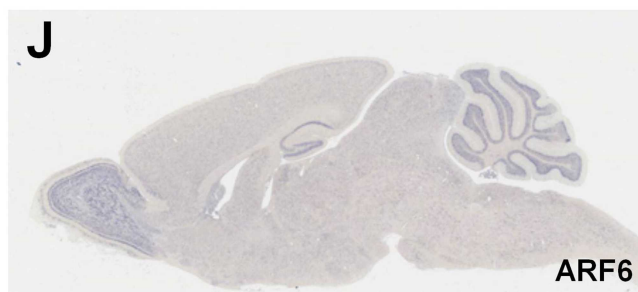

Fig. S3

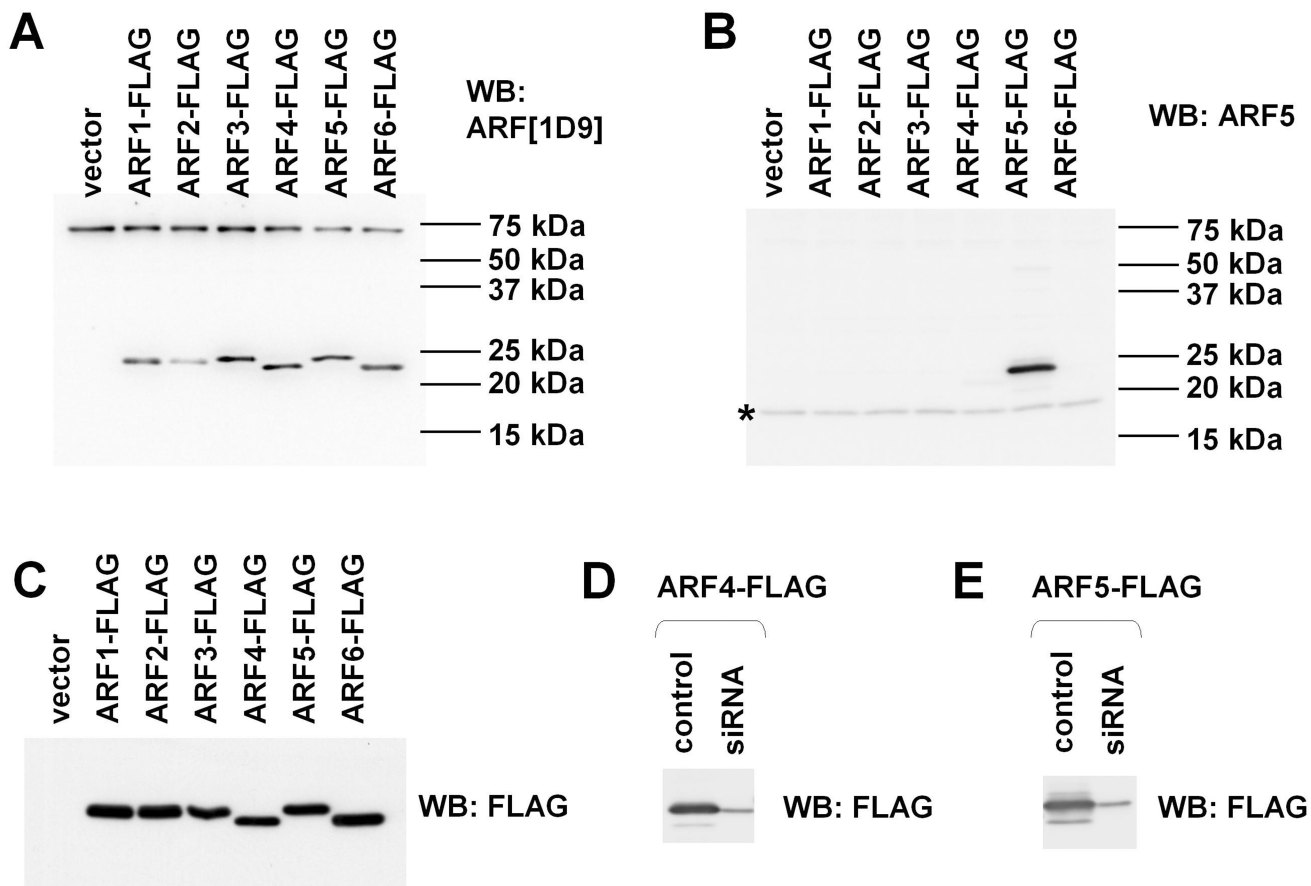

Fig. S4

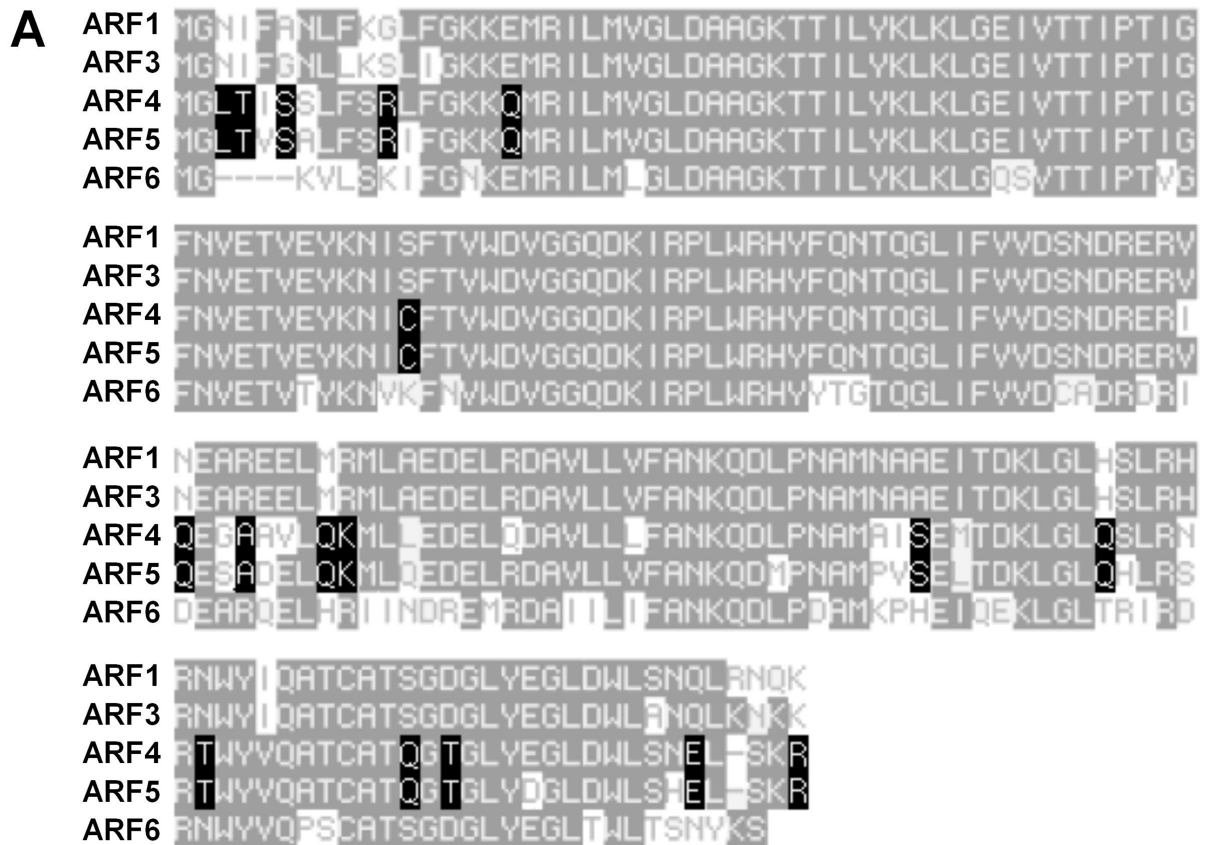

**B**

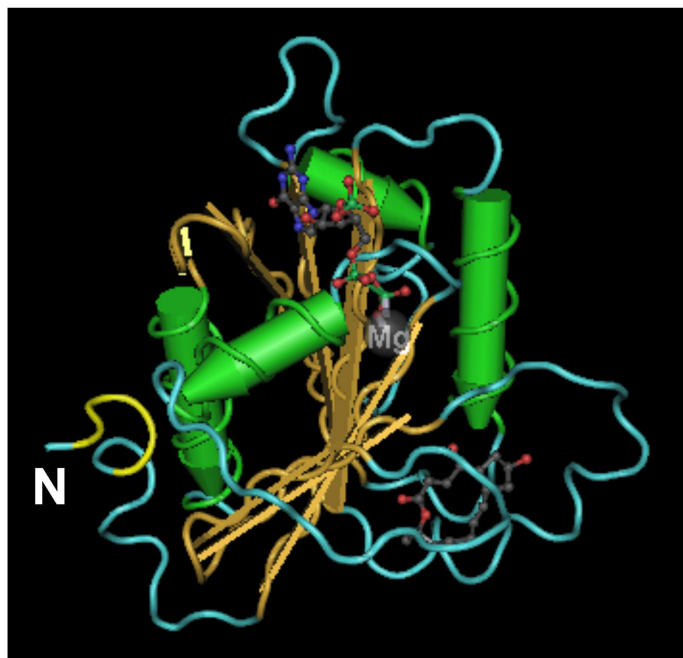

Supplement: supp_M110.137414_jbc.M110.137414-1.pdf [file supp_M110.137414_jbc.M110.137414-1.pdf]
